# Supplementary material
Source: MDPI journal article supplement (https://www.mdpi.com/2312-7481/9/3/69)
Supplement: s1 [file s1]

# Supporting Information for

*Article*

## Diverse Magnetic Properties of Two New Binuclear Complexes Affected by [FeN<sub>6</sub>] Octahedral Distortion: Two-Step Spin Crossover Versus Antiferromagnetic Interactions

Yue Gao <sup>1,†</sup>, Yu-Qin Li <sup>1,†</sup>, Yao Li <sup>1</sup>, Jing-Wei Dai <sup>2,\*</sup>, Jin-Hua Wang <sup>3</sup>, Ying-Ying Wu <sup>1</sup>, Masahiro Yamashita <sup>4</sup> and Zhao-Yang Li <sup>1</sup>

<sup>1</sup> School of Materials Science and Engineering, Nankai University, 38 Tongyan Road, Tianjin 300350, China

<sup>2</sup> State Key Laboratory of Medicinal Chemical Biology, Nankai University, 94 Weijin Road, Tianjin 300071, China

<sup>3</sup> College of Medicine and Nursing, Dezhou University, Decheng District, Dezhou 253023, China

<sup>4</sup> Department of Chemistry, Graduate School of Science, Tohoku University, 6-3 Aramaki-Aza-Aoba, Aoba-Ku, Sendai 980-8578, Japan

\* Correspondence: jingweidai@nankai.edu.cn

† These authors contributed equally to this work.

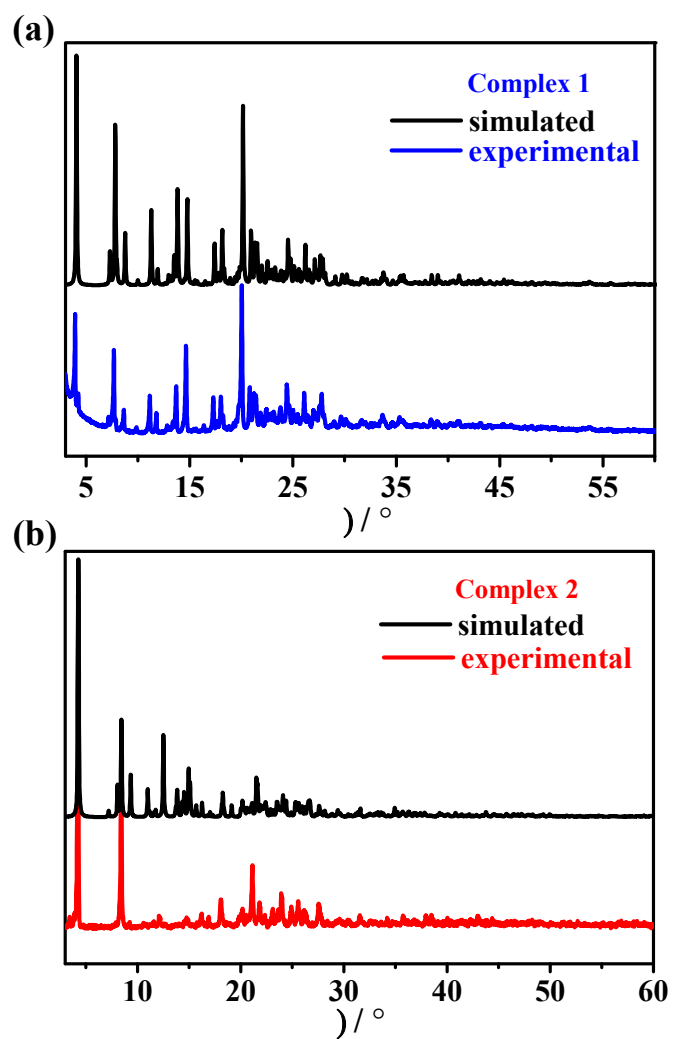

**Figure S1.** PXRD for complexes 1 (top) and 2 (bottom) at room temperature.

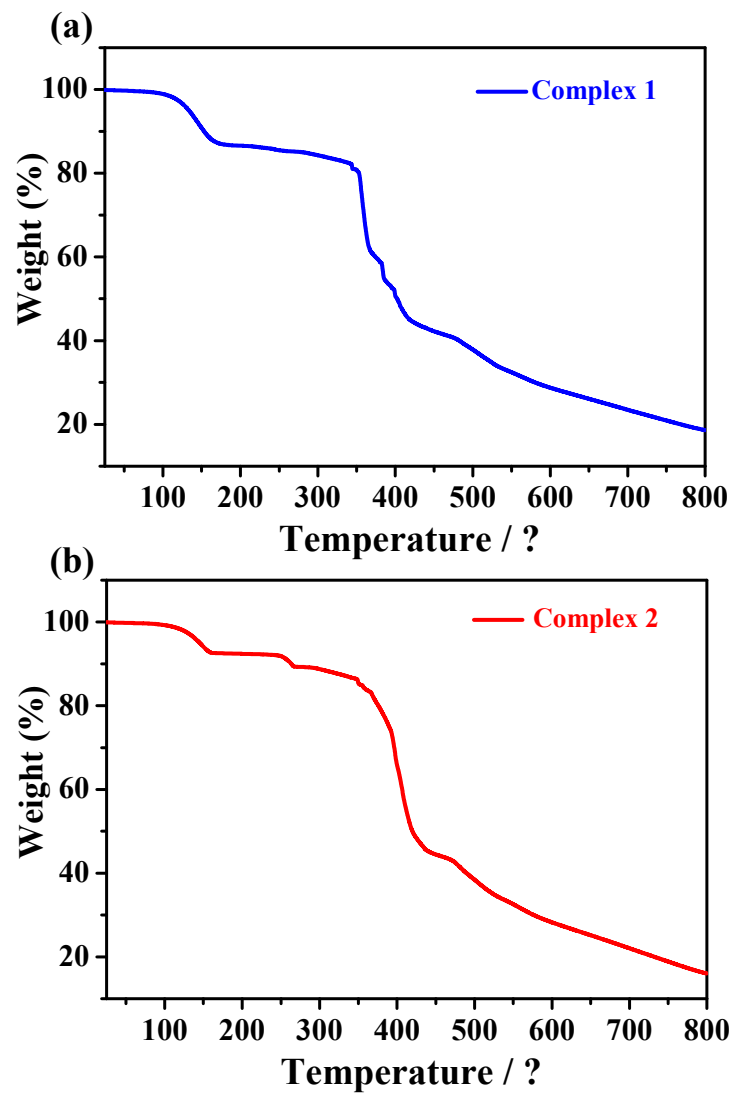

Figure S2. TG curves of complexes 1 (top) and 2 (bottom).

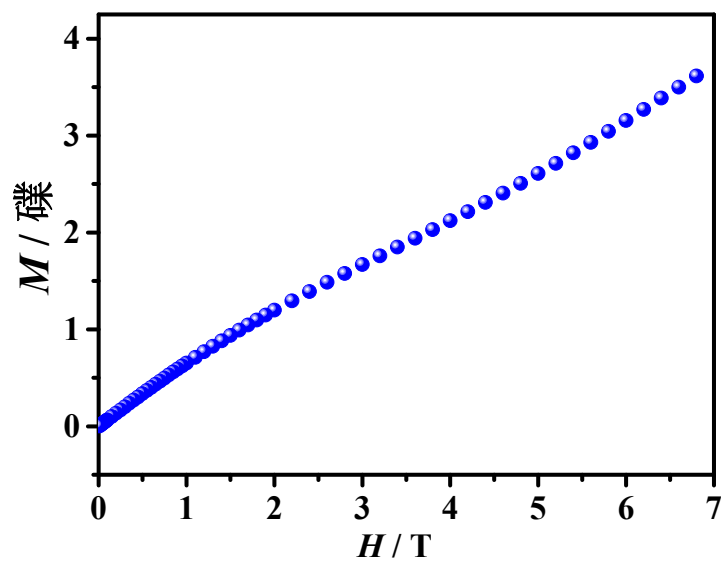

Figure S3. Plot of magnetization ( $M$ ) vs. field ( $H$ ) for complex 2.

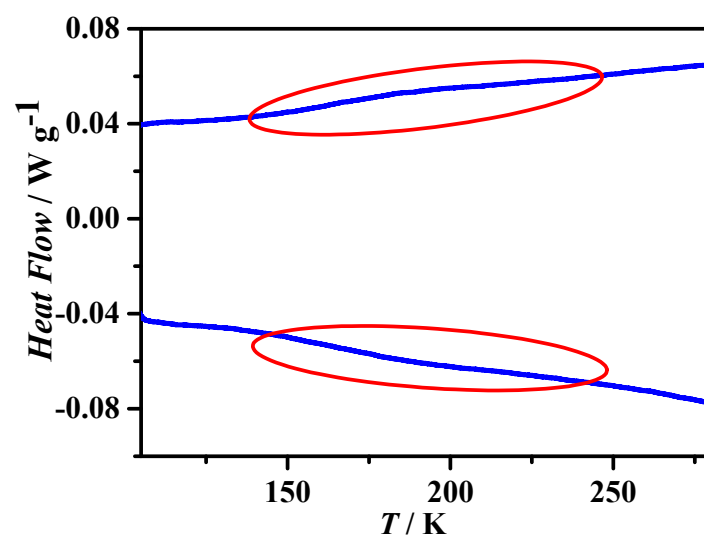

**Figure S4.** DSC curves for complex 1 in the heating and cooling modes.

**Table S1.** Selected crystallographic data for complex **1**.

| Complex <b>1</b>                                                            |                                                                                               |               |               |
|-----------------------------------------------------------------------------|-----------------------------------------------------------------------------------------------|---------------|---------------|
| Temperature (K)                                                             | 100.00(10)                                                                                    | 149.99(10)    | 299.9(2)      |
| Empirical formula                                                           | C <sub>96</sub> H <sub>76</sub> Fe <sub>2</sub> N <sub>22</sub> O <sub>2</sub> S <sub>4</sub> |               |               |
| Formula weight                                                              | 1809.72                                                                                       |               |               |
| Crystal system                                                              | triclinic                                                                                     |               |               |
| Space group                                                                 | <i>P</i> -1                                                                                   |               |               |
| <i>a</i> (Å)                                                                | 7.9613(4)                                                                                     | 7.9229(3)     | 8.0625(4)     |
| <i>b</i> (Å)                                                                | 12.2941(7)                                                                                    | 12.3251(4)    | 12.4506(6)    |
| <i>c</i> (Å)                                                                | 22.5759(13)                                                                                   | 22.7521(9)    | 23.0585(8)    |
| $\alpha$ (°)                                                                | 81.117(5)                                                                                     | 81.092(3)     | 81.650(4)     |
| $\beta$ (°)                                                                 | 80.286(5)                                                                                     | 80.398(4)     | 80.018(4)     |
| $\gamma$ (°)                                                                | 86.964(4)                                                                                     | 86.615(3)     | 87.305(4)     |
| <i>V</i> (Å <sup>3</sup> )                                                  | 2151.0(2)                                                                                     | 2162.95(14)   | 2254.91(18)   |
| <i>Z</i>                                                                    | 1                                                                                             | 1             | 1             |
| $\rho_{\text{calc}}$ (g·cm <sup>-3</sup> )                                  | 1.397                                                                                         | 1.389         | 1.333         |
| <i>F</i> (000)                                                              | 938.0                                                                                         | 938.0         | 938.0         |
| $\mu$ (mm <sup>-1</sup> )                                                   | 4.136                                                                                         | 4.114         | 3.946         |
| GOF on <i>F</i> <sup>2</sup>                                                | 1.054                                                                                         | 1.057         | 1.241         |
| <i>R</i> <sub>1</sub> , <i>wR</i> <sub>2</sub> ( <i>I</i> >2σ ( <i>I</i> )) | 0.0716/0.1767                                                                                 | 0.0576/0.1392 | 0.0844/0.3572 |
| <i>R</i> <sub>1</sub> , <i>wR</i> <sub>2</sub> (all data)                   | 0.1064/0.1922                                                                                 | 0.0932/0.1567 | 0.1862/0.4077 |
| CCDC number                                                                 | 2182046                                                                                       | 2181920       | 2182048       |

$$^a R_1 = \Sigma ||F_o| - |F_c|| / \Sigma |F_o|, \quad ^b wR_2 = [\Sigma w(F_o^2 - F_c^2)^2 / \Sigma w(F_o^2)^2]^{1/2}$$

**Table S2.** Selected crystallographic data for complex **2**.

| Complex <b>2</b>  |                                                                                                |                                            |                |
|-------------------|------------------------------------------------------------------------------------------------|--------------------------------------------|----------------|
| Temperature (K)   | 100                                                                                            | $\gamma$ (°)                               | 90             |
| Empirical formula | C <sub>92</sub> H <sub>66</sub> Cl <sub>4</sub> Fe <sub>2</sub> N <sub>20</sub> S <sub>4</sub> | $V$ (Å <sup>3</sup> )                      | 4737.13(19)    |
| Formula weight    | 1833.38                                                                                        | $Z$                                        | 2              |
| Crystal system    | monoclinic                                                                                     | $\rho_{\text{calc}}$ (g·cm <sup>-3</sup> ) | 1.285          |
| Space group       | $P2_1/n$                                                                                       | $F(000)$                                   | 1884.0         |
| $a$ (Å)           | 8.6220(2)                                                                                      | $\mu$ (mm <sup>-1</sup> )                  | 4.755          |
| $b$ (Å)           | 42.2912(9)                                                                                     | GOF on $F^2$                               | 1.121          |
| $c$ (Å)           | 13.5723(3)                                                                                     | $R_1, wR_2$ (I>2 $\sigma$ (I))             | 0.0842, 0.2525 |
| $\alpha$ (°)      | 90                                                                                             | $R_1, wR_2$ (all data)                     | 0.0961, 0.2689 |
| $\beta$ (°)       | 106.823(2)                                                                                     | CCDC number                                | 2182052        |

$$^a R_I = \Sigma ||F_o| - |F_c|| / \Sigma |F_o|. \quad ^b wR_2 = [\Sigma w(F_o^2 - F_c^2)^2 / \Sigma w(F_o^2)^2]^{1/2}$$
